# Supplementary material
Source: PubMed Central journal article supplement (PMC11113716)
Supplement: 18_2013_1270_MOESM2_ESM.pdf [file 18_2013_1270_MOESM2_ESM.pdf]

## B.

### PIP PBD

|             |                     |                     |                     |                     |                     |                     |       |
|-------------|---------------------|---------------------|---------------------|---------------------|---------------------|---------------------|-------|
| Human_ING1b | MLSPANG <b>EQ</b> L | HLVNY <b>VE</b> DYL | DSIESL <b>P</b> FDL | QRNVSL <b>M</b> REI | DAKY <b>Q</b> EILKE | LDECYERFSR          | 60    |
| Mouse_ING1a | -----               | -----               | -----               | -----               | -----               | -----               | ----- |
| Mouse_ING1b | MLSPANG <b>EQ</b> I | HLVNY <b>VE</b> DYL | DSIESL <b>P</b> FDL | QRNVSL <b>M</b> REI | DAKY <b>Q</b> EILKE | LDDY <b>Y</b> EKFKR | 60    |
| Mouse_ING1c | -----               | -----               | -----               | -----               | -----               | -----               | ----- |

### NCR

|             |            |                              |                                       |                              |                                                |                                       |     |
|-------------|------------|------------------------------|---------------------------------------|------------------------------|------------------------------------------------|---------------------------------------|-----|
| Human_ING1b | ETDGAQKRRM | LHC <b>V</b> Q <b>R</b> ALIR | S <b>Q</b> ELG <b>D</b> E <b>K</b> IQ | IVS <b>Q</b> M <b>V</b> ELVE | NR <b>T</b> R <b>Q</b> VD <b>S</b> HV          | EL <b>F</b> E <b>A</b> Q <b>Q</b> ELG | 120 |
| Mouse_ING1a | -----      | -----                        | -----                                 | ---- <b>M</b> VELVE          | N <b>R</b> S <b>R</b> Q <b>V</b> D <b>S</b> HV | EL <b>F</b> E <b>A</b> H <b>Q</b> DIS | 26  |
| Mouse_ING1b | ETDGTQKRRV | LHC <b>I</b> Q <b>R</b> ALIR | S <b>Q</b> ELG <b>D</b> E <b>K</b> IQ | IVS <b>Q</b> M <b>V</b> ELVE | N <b>R</b> S <b>R</b> Q <b>V</b> D <b>S</b> HV | EL <b>F</b> E <b>A</b> H <b>Q</b> DIS | 120 |
| Mouse_ING1c | -----      | -----                        | -----                                 | ---- <b>M</b> VELVE          | N <b>R</b> S <b>R</b> Q <b>V</b> D <b>S</b> HV | EL <b>F</b> E <b>A</b> H <b>Q</b> DIS | 26  |

### NTS

### NLS

### NTS

|             |                    |                                       |                                       |                                      |                                              |                                       |     |
|-------------|--------------------|---------------------------------------|---------------------------------------|--------------------------------------|----------------------------------------------|---------------------------------------|-----|
| Human_ING1b | <b>D</b> TAGNSGKAG | AD <b>R</b> PK <b>G</b> EAAA          | Q <b>A</b> D <b>K</b> P <b>N</b> SKRS | RR <b>Q</b> R <b>N</b> N <b>E</b> NR | N <b>A</b> SS <b>N</b> H <b>D</b> H <b>D</b> | G <b>A</b> S <b>G</b> T <b>P</b> KEKK | 180 |
| Mouse_ING1a | <b>D</b> GTGGSGKAG | Q <b>D</b> K <b>S</b> K <b>S</b> EAIT | Q <b>A</b> D <b>K</b> P <b>N</b> SKRS | RR <b>Q</b> R <b>N</b> N <b>E</b> NR | N <b>A</b> SS <b>N</b> H <b>D</b> H <b>D</b> | I <b>T</b> S <b>G</b> T <b>P</b> KEKK | 86  |
| Mouse_ING1b | <b>D</b> GTGGSGKAG | Q <b>D</b> K <b>S</b> K <b>S</b> EAIT | Q <b>A</b> D <b>K</b> P <b>N</b> SKRS | RR <b>Q</b> R <b>N</b> N <b>E</b> NR | N <b>A</b> SS <b>N</b> H <b>D</b> H <b>D</b> | I <b>T</b> S <b>G</b> T <b>P</b> KEKK | 180 |
| Mouse_ING1c | <b>D</b> GTGGSGKAG | Q <b>D</b> K <b>S</b> K <b>S</b> EAIT | Q <b>A</b> D <b>K</b> P <b>N</b> SKRS | RR <b>Q</b> R <b>N</b> N <b>E</b> NR | N <b>A</b> SS <b>N</b> H <b>D</b> H <b>D</b> | I <b>T</b> S <b>G</b> T <b>P</b> KEKK | 86  |

### NTS

### REASP

### PHD

|             |                                               |                                                |                                       |                                                |                                                        |                                                        |     |
|-------------|-----------------------------------------------|------------------------------------------------|---------------------------------------|------------------------------------------------|--------------------------------------------------------|--------------------------------------------------------|-----|
| Human_ING1b | <b>A</b> K <b>T</b> S <b>K</b> K <b>K</b> KRS | K <b>A</b> K <b>A</b> E <b>R</b> E <b>A</b> SP | AD <b>L</b> P <b>I</b> D <b>P</b> NEP | TY <b>C</b> L <b>C</b> N <b>Q</b> V <b>S</b> Y | <b>G</b> E <b>M</b> I <b>G</b> C <b>D</b> N <b>D</b> E | <b>C</b> P <b>I</b> E <b>W</b> F <b>H</b> F <b>S</b> C | 240 |
| Mouse_ING1a | <b>A</b> K <b>T</b> S <b>K</b> K <b>K</b> KRS | K <b>A</b> K <b>A</b> E <b>R</b> E <b>A</b> SP | AD <b>L</b> P <b>I</b> D <b>P</b> NEP | TY <b>C</b> L <b>C</b> N <b>Q</b> V <b>S</b> Y | <b>G</b> E <b>M</b> I <b>G</b> C <b>D</b> N <b>D</b> E | <b>C</b> P <b>I</b> E <b>W</b> F <b>H</b> F <b>S</b> C | 146 |
| Mouse_ING1b | <b>A</b> K <b>T</b> S <b>K</b> K <b>K</b> KRS | K <b>A</b> K <b>A</b> E <b>R</b> E <b>A</b> SP | AD <b>L</b> P <b>I</b> D <b>P</b> NEP | TY <b>C</b> L <b>C</b> N <b>Q</b> V <b>S</b> Y | <b>G</b> E <b>M</b> I <b>G</b> C <b>D</b> N <b>D</b> E | <b>C</b> P <b>I</b> E <b>W</b> F <b>H</b> F <b>S</b> C | 240 |
| Mouse_ING1c | <b>A</b> K <b>T</b> S <b>K</b> K <b>K</b> KRS | K <b>A</b> K <b>A</b> E <b>R</b> E <b>A</b> SP | AD <b>L</b> P <b>I</b> D <b>P</b> NEP | TY <b>C</b> L <b>C</b> N <b>Q</b> V <b>S</b> Y | <b>G</b> E <b>M</b> I <b>G</b> C <b>D</b> N <b>D</b> E | <b>C</b> P <b>I</b> E <b>W</b> F <b>H</b> F <b>S</b> C | 146 |

### PBR

|             |                                   |     |                              |                                                        |                                               |     |
|-------------|-----------------------------------|-----|------------------------------|--------------------------------------------------------|-----------------------------------------------|-----|
| Human_ING1b | <b>V</b> GL <b>N</b> H <b>K</b> P | KGK | W <b>Y</b> CP <b>K</b> CRGEN | E <b>K</b> T <b>M</b> D <b>K</b> A <b>L</b> E <b>K</b> | S <b>K</b> K <b>E</b> R <b>A</b> Y <b>N</b> R | 279 |
| Mouse_ING1a | <b>V</b> GL <b>N</b> H <b>K</b> P | KGK | W <b>Y</b> CP <b>K</b> CRGES | E <b>K</b> T <b>M</b> D <b>K</b> A <b>L</b> E <b>K</b> | S <b>K</b> K <b>E</b> R <b>A</b> Y <b>N</b> R | 185 |
| Mouse_ING1b | <b>V</b> GL <b>N</b> H <b>K</b> P | KGK | W <b>Y</b> CP <b>K</b> CRGES | E <b>K</b> T <b>M</b> D <b>K</b> A <b>L</b> E <b>K</b> | S <b>K</b> K <b>E</b> R <b>A</b> Y <b>N</b> R | 279 |
| Mouse_ING1c | <b>V</b> GL <b>N</b> H <b>K</b> P | KGK | W <b>Y</b> CP <b>K</b> CRGES | E <b>K</b> T <b>M</b> D <b>K</b> A <b>L</b> E <b>K</b> | S <b>K</b> K <b>E</b> R <b>A</b> Y <b>N</b> R | 185 |



# D.

## LZI

|             |            |            |             |            |            |            |     |
|-------------|------------|------------|-------------|------------|------------|------------|-----|
| Human_ING2a | MLGQQQQQL- | YSSAALLTGE | RSRLLTTCYVQ | DYLECVESLP | HDMQRNVSVL | RELDNKYQET | 59  |
| Human_ING2b | -----      | -----      | -----       | -----      | -MDQDGDQQL | GPSRILAPQT | 19  |
| Mouse_ING2a | MLGQQQQQQL | YSSAALLTGE | RSRLLSYVQ   | DYLECVESLP | HDMQRNVSVL | RELDNKYQET | 60  |
| Mouse_ING2b | -----      | -----      | -----       | -----      | -----      | -----      | --- |

## NCR

|             |            |           |           |            |            |            |     |
|-------------|------------|-----------|-----------|------------|------------|------------|-----|
| Human_ING2a | LKEIDDVYEK | YKEDDLNQK | KRLQQLQRA | LINSQELGDE | KIQIVTQMLE | LVENRARQME | 119 |
| Human_ING2b | LKEIDDVYEK | YKEDDLNQK | KRLQQLQRA | LINSQELGDE | KIQIVTQMLE | LVENRARQME | 79  |
| Mouse_ING2a | LKEIDDVYEK | YKEDDSNQK | KRLQQLQRA | LINSQELGDE | KIQIVTQMLE | LVENRARQME | 120 |
| Mouse_ING2b | -----      | -----     | -----     | -----      | -----MLE   | LVENRARQME | 13  |
|             | *****      | *****     | *****     | *****      | ***        | *****      | *** |

## NTS

## NLS

|             |            |            |            |            |            |            |       |
|-------------|------------|------------|------------|------------|------------|------------|-------|
| Human_ING2a | LHSQCFQDPA | ESERASDKAK | MDSSQPERSS | RRRRRQRTSE | SRDLCHMANG | IEDCDDQPPK | 179   |
| Human_ING2b | LHSQCFQDPA | ESERASDKAK | MDSSQPERSS | RRRRRQRTSE | SRDLCHMANG | IEDCDDQPPK | 139   |
| Mouse_ING2a | LHSQCFQDPA | ESERASDKSK | MDSSQPERSS | RRRRRQRTSE | SRDLCHMTNG | IDDCDDQPPK | 180   |
| Mouse_ING2b | LHSQCFQDPA | ESERASDKSK | MDSSQPERSS | RRRRRQRTSE | SRDLCHMTNG | IDDCDDQPPK | 73    |
|             | *****      | *****      | *****      | *****      | *****      | *****      | ***** |

## NTS

## REASP

|             |           |            |           |            |            |             |       |
|-------------|-----------|------------|-----------|------------|------------|-------------|-------|
| Human_ING2a | EKKKSAKKK | KRSKAKQERE | ASPVFAIDP | NEPTYCLCNQ | VSYGEMIGCD | NEQCPIEFWFH | 239   |
| Human_ING2b | EKKKSAKKK | KRSKAKQERE | ASPVFAIDP | NEPTYCLCNQ | VSYGEMIGCD | NEQCPIEFWFH | 199   |
| Mouse_ING2a | EKRKSAKKK | KRSKAKQERE | ASPVFAIDP | NEPTYCLCNQ | VSYGEMIGCD | NEQCPIEFWFH | 240   |
| Mouse_ING2b | EKRKSAKKK | KRSKAKQERE | ASPVFAIDP | NEPTYCLCNQ | VSYGEMIGCD | NEQCPIEFWFH | 133   |
|             | *****     | *****      | *****     | *****      | *****      | *****       | ***** |

## PHD

## PBR

|             |            |             |            |            |       |       |
|-------------|------------|-------------|------------|------------|-------|-------|
| Human_ING2a | FSCVSLTYKP | KGKWCYCPKCR | GDNEKTMDKS | TEKTKKDRRS | R     | 280   |
| Human_ING2b | FSCVSLTYKP | KGKWCYCPKCR | GDNEKTMDKS | TEKTKKDRRS | R     | 240   |
| Mouse_ING2a | FSCVSLTYKP | KGKWCYCPKCR | GDNEKTMDKS | TEKTKKERRA | R     | 281   |
| Mouse_ING2b | FSCVSLTYKP | KGKWCYCPKCR | GDNEKTMDKS | TEKTKKERRA | R     | 174   |
|             | *****      | *****       | *****      | *****      | ***** | ***** |
