# Supplementary material
Source: PubMed Central journal article supplement (PMC11113716)

# FigS1

A.

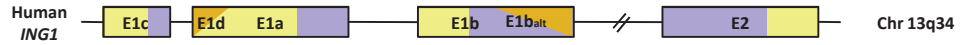

B.

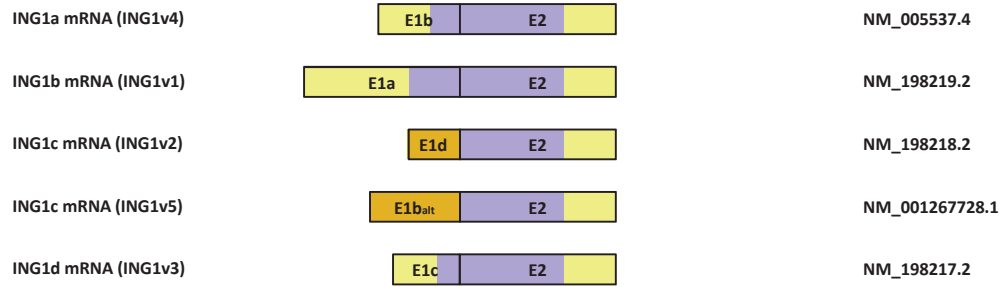

C.

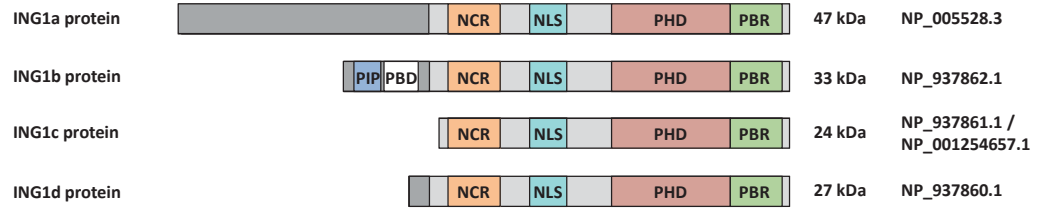

D.

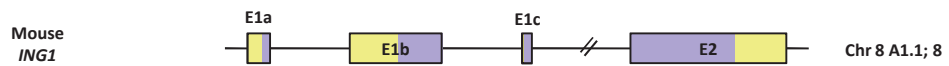

E.

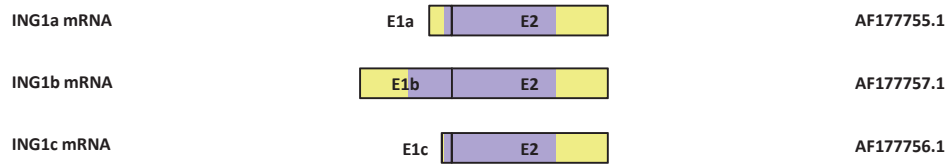

F.

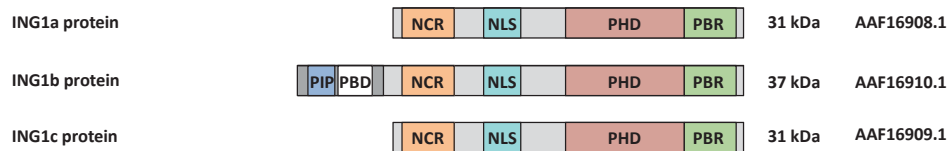

G.

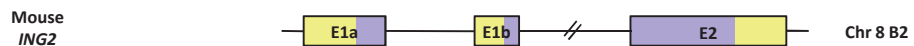

H.

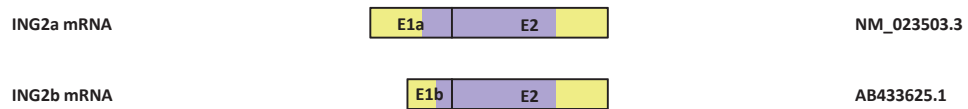

I.

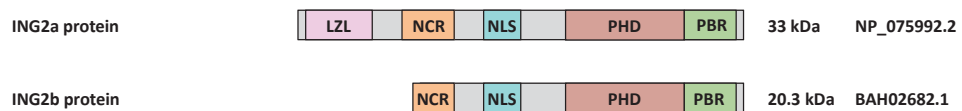

Supplement: 18_2013_1270_MOESM1_ESM.pdf [file 18_2013_1270_MOESM1_ESM.pdf]
